# Supplementary material for: The impact of widespread regulatory neofunctionalization on homeolog gene evolution following whole-genome duplication in maize
Source: HighWire-hosted journal article supplement (doi:10.1101/gr.172684.114), 2014-04-30
Supplement: Supplemental_Table_1.xlsx [file Supplemental_Table_1.xlsx]

## Sheet: Sheet1
	Non-regulatory neofunctionalised		Regulatory neofunctionalised
			Foliar		Husk		Foliar & Husk
	Profile	Homeolog pairs	Profile	Homeolog pairs	Profile	Homeolog pairs	Profile	Homeolog pairs
	DDDD	5	NNAN	47	DNDD	1	AAND	1
	NNNN	2128	DNAN	4	DDDN	3	ANND	1
	NANA	9	AANA	6	NNND	5	DNND	2
	AAAA	14	ANNN	65	NNNA	36	NNDD	2
	NDND	4	DNNN	39	NDNN	19	NNDA	2
	ANAN	24	ANDN	3	ANAA	11	NDAN	3
	DNDN	11	NAAA	4	AAAN	11	DNNA	2
			NNDN	34	NANN	50	ANNA	7
			DDND	1			DNAA	1
			DAAA	1			ANDA	1
			NDDD	1			AANN	17
							NNAA	19
							NADD	1
							DDNN	6
							NAAN	4
							NADN	2
	Total	2195	Total	205	Total	136	Total	71
