# Supplementary material for: The impact of widespread regulatory neofunctionalization on homeolog gene evolution following whole-genome duplication in maize
Source: HighWire-hosted journal article supplement (doi:10.1101/gr.172684.114), 2014-04-30
Supplement: Supplemental_Table_2.xlsx [file Supplemental_Table_2.xlsx]

## Sheet: Sheet1
Neofunctionalisation	Term	ID	Description	P Value	Homeologs with annotation
Foliar	GO	GO:0005634	nucleus	1.74e-07	52
Foliar	GO	GO:0006355	regulation of transcription, DNA-dependent	6.36e-06	41
Foliar	GO	GO:0030001	metal ion transport	2.3e-05	12
Foliar	GO	GO:0030528	transcription regulator activity	0.00021628	19
Foliar	GO	GO:0015979	photosynthesis	0.00021628	8
Foliar	GO	GO:0000155	two-component sensor activity	0.000365504	6
Foliar	GO	GO:0046872	metal ion binding	0.000598592	14
Foliar	GO	GO:0005992	trehalose biosynthetic process	0.000887109	6
Foliar	GO	GO:0003700	sequence-specific DNA binding transcription factor activity	0.00295774	25
Foliar	GO	GO:0000156	two-component response regulator activity	0.00663776	6
Foliar	GO	GO:0043565	sequence-specific DNA binding	0.011399	19
Foliar	GO	GO:0000160	two-component signal transduction system (phosphorelay)	0.011399	6
Foliar	GO	GO:0048529	magnesium-protoporphyrin IX monomethyl ester (oxidative) cyclase activity	0.0153624	2
Foliar	GO	GO:0019419	sulfate reduction	0.0202063	2
Foliar	GO	GO:0003677	DNA binding	0.0202063	43
Foliar	GO	GO:0004612	phosphoenolpyruvate carboxykinase (ATP) activity	0.0276963	2
Foliar	mapman	1.1	PS.lightreaction	6.04e-07	15
Foliar	mapman	1	PS	4.22e-06	17
Foliar	mapman	27.3	RNA.regulation of transcription	4.22e-06	71
Foliar	mapman	14	S-assimilation	0.00013233	4
Foliar	mapman	1.1.1	PS.lightreaction.photosystem II	0.000202574	7
Foliar	mapman	3.2	minor CHO metabolism.trehalose	0.000202574	6
Foliar	mapman	15	metal handling	0.000202574	7
Foliar	mapman	27	RNA	0.000533558	75
Foliar	mapman	1.1.2	PS.lightreaction.photosystem I	0.00285128	4
Foliar	mapman	10.1	cell wall.precursor synthesis	0.00445453	6
Foliar	mapman	17	hormone metabolism	0.00445453	17
Foliar	mapman	33	development	0.0153123	18
Foliar	mapman	29.2.1	protein.synthesis.ribosomal protein	0.0281316	12
Foliar	mapman	3	minor CHO metabolism	0.0281316	8
Foliar	mapman	29.2.1.99.1	protein.synthesis.ribosomal protein.unknown.small subunit	0.0281316	2
Foliar	mapman	17.4	hormone metabolism.cytokinin	0.0303356	4
Foliar	mapman	29.2.1.1.1.2	protein.synthesis.ribosomal protein.prokaryotic.chloroplast.50S subunit	0.0458632	4
Foliar	mapman	10.1.1	cell wall.precursor synthesis.NDP sugar pyrophosphorylase	0.0458632	2
Foliar	Pathway	SULFMETII-PWY	sulfate reduction II (assimilatory)	0.00271499	4
Foliar	PFAM	PF00403.21	HMA	2.26e-07	14
Foliar	PFAM	PF00512.20	HisKA	0.000544656	6
Foliar	PFAM	PF04873.8	EIN3	0.00162831	4
Foliar	PFAM	PF02518.21	HATPase_c	0.00162831	6
Foliar	PFAM	PF02358.11	Trehalose_PPase	0.00207575	6
Foliar	PFAM	PF03924.8	CHASE	0.00289861	4
Foliar	PFAM	PF00072.19	Response_reg	0.0156542	7
Foliar	PFAM	PF01241.13	PSI_PSAK	0.0337575	2
Foliar	PFAM	PF00924.13	MS_channel	0.0337575	3
Foliar	PFAM	PF02427.12	PSI_PsaE	0.0337575	2
Foliar	PFAM	PF13326.1	PSII_Pbs27	0.0354598	2
Foliar	PFAM	PF02915.12	Rubrerythrin	0.0354598	2
Foliar	PFAM	PF01698.11	FLO_LFY	0.0354598	2
Foliar	PFAM	PF00101.15	RuBisCO_small	0.0354598	2
Foliar	PFAM	PF12338.3	RbcS	0.0354598	2
Foliar	PFAM	PF00046.24	Homeobox	0.0398169	7
Foliar	PFAM	PF02309.11	AUX_IAA	0.0398169	6
Foliar	PFAM	PF00504.16	Chloroa_b-bind	0.0398169	4
Foliar	PFAM	PF07014.7	Hs1pro-1_C	0.0398169	2
Foliar	PFAM	PF07231.7	Hs1pro-1_N	0.0398169	2
Foliar	PFAM	PF03195.9	DUF260	0.0456446	4
Husk	GO	GO:0006950	response to stress	0.0316973	6
Husk	GO	GO:0004990	oxytocin receptor activity	0.0316973	3
Husk	GO	GO:0005886	plasma membrane	0.0316973	3
Husk	GO	GO:0004657	proline dehydrogenase activity	0.0316973	2
Husk	GO	GO:0006562	proline catabolic process	0.0316973	2
Husk	GO	GO:0003677	DNA binding	0.0334987	32
Husk	PFAM	PF03634.8	TCP	0.0230029	5
Foliar & Husk	GO	GO:0030528	transcription regulator activity	2.41e-06	14
Foliar & Husk	GO	GO:0006807	nitrogen compound metabolic process	0.00707185	4
Foliar & Husk	GO	GO:0004107	chorismate synthase activity	0.00707185	2
Foliar & Husk	GO	GO:0016788	hydrolase activity, acting on ester bonds	0.00707185	6
Foliar & Husk	GO	GO:0045181	glutamate synthase activity, NADH or NADPH as acceptor	0.043165	2
Foliar & Husk	mapman	12	N-metabolism	5.7e-06	6
Foliar & Husk	mapman	12.2	N-metabolism ammonia metabolism	5.52e-05	4
Foliar & Husk	mapman	27.3	RNA.regulation of transcription	0.000524199	30
Foliar & Husk	mapman	34	transport	0.0142161	16
Foliar & Husk	mapman	27	RNA	0.0142161	30
Foliar & Husk	mapman	10.5	cell wall.cell wall proteins	0.0142161	4
Foliar & Husk	mapman	34.2	transport.sugars	0.0180956	2
Foliar & Husk	mapman	20.2	stress.abiotic	0.0258707	8
Foliar & Husk	mapman	13.2.5	amino acid metabolism.degradation.serine-glycine-cysteine group	0.0258707	2
Foliar & Husk	Pathway	PWY-3282	ammonia assimilation cycle II	0.000101624	4
Foliar & Husk	Pathway	PWY-381	nitrate reduction II (assimilatory)	0.000101624	4
Foliar & Husk	Pathway	GLUGLNSYN-PWY	glutamate biosynthesis IV	0.0399854	2
Foliar & Husk	PFAM	PF00010.21	HLH	4.68e-05	9
Foliar & Husk	PFAM	PF00657.17	Lipase_GDSL	0.0121398	6
Foliar & Husk	PFAM	PF01264.16	Chorismate_synt	0.0242752	2
