# Supplementary material for: The impact of widespread regulatory neofunctionalization on homeolog gene evolution following whole-genome duplication in maize
Source: HighWire-hosted journal article supplement (doi:10.1101/gr.172684.114), 2014-04-30
Supplement: Supplemental_Table_3.xlsx [file Supplemental_Table_3.xlsx]

## Sheet: Sheet1
Neofunctionalisation	Term	ID	Description	P Value	Homeologs with annotation
Foliar	GO	GO:0005634	nucleus	3.39231e-29	52
Foliar	GO	GO:0006355	regulation of transcription, DNA-dependent	6.6645e-23	41
Foliar	GO	GO:0016020	membrane	7.20348e-23	40
Foliar	GO	GO:0003677	DNA binding	3.84337e-19	43
Foliar	GO	GO:0005622	intracellular	4.14877e-14	30
Foliar	GO	GO:0003700	sequence-specific DNA binding transcription factor activity	2.10306e-13	25
Foliar	GO	GO:0030001	metal ion transport	7.01265e-13	12
Foliar	GO	GO:0030528	transcription regulator activity	7.10805e-13	19
Foliar	GO	GO:0046872	metal ion binding	4.22633e-12	14
Foliar	GO	GO:0042309	homoiothermy	2.06115e-11	23
Foliar	GO	GO:0050825	ice binding	2.06115e-11	23
Foliar	GO	GO:0050826	response to freezing	2.06115e-11	23
Foliar	GO	GO:0003824	catalytic activity	2.23771e-10	22
Foliar	GO	GO:0005524	ATP binding	2.29965e-10	36
Foliar	GO	GO:0043565	sequence-specific DNA binding	2.40756e-10	19
Foliar	GO	GO:0015979	photosynthesis	3.32969e-10	8
Foliar	GO	GO:0055085	transmembrane transport	1.01063e-09	17
Foliar	GO	GO:0055114	oxidation-reduction process	1.47125e-09	20
Foliar	GO	GO:0008152	metabolic process	3.43038e-09	20
Foliar	GO	GO:0008270	zinc ion binding	6.06684e-09	27
Foliar	GO	GO:0006412	translation	2.21974e-08	16
Foliar	GO	GO:0007186	G-protein coupled receptor signaling pathway	1.75794e-07	13
Foliar	GO	GO:0005992	trehalose biosynthetic process	2.02236e-07	6
Foliar	GO	GO:0005840	ribosome	2.13187e-07	14
Foliar	GO	GO:0016021	integral to membrane	2.13187e-07	20
Foliar	GO	GO:0003735	structural constituent of ribosome	2.26323e-07	14
Foliar	GO	GO:0000156	two-component response regulator activity	1.28539e-06	6
Foliar	GO	GO:0000155	two-component sensor activity	1.63389e-06	6
Foliar	GO	GO:0000160	two-component signal transduction system (phosphorelay)	2.11518e-06	6
Foliar	GO	GO:0005515	protein binding	2.59109e-06	22
Foliar	GO	GO:0005506	iron ion binding	2.77569e-06	10
Foliar	GO	GO:0004871	signal transducer activity	8.71389e-06	7
Foliar	GO	GO:0015097	mercury ion transmembrane transporter activity	8.71389e-06	3
Foliar	GO	GO:0015694	mercury ion transport	8.71389e-06	3
Foliar	GO	GO:0009058	biosynthetic process	1.02237e-05	8
Foliar	GO	GO:0016491	oxidoreductase activity	1.27301e-05	12
Foliar	GO	GO:0007165	signal transduction	2.42412e-05	9
Foliar	GO	GO:0009416	response to light stimulus	0.000110609	4
Foliar	GO	GO:0006281	DNA repair	0.000128342	5
Foliar	GO	GO:0006813	potassium ion transport	0.000172279	6
Foliar	GO	GO:0004497	monooxygenase activity	0.000179689	6
Foliar	GO	GO:0009055	electron carrier activity	0.000238709	8
Foliar	GO	GO:0031072	heat shock protein binding	0.00033402	6
Foliar	GO	GO:0046914	transition metal ion binding	0.000451449	3
Foliar	GO	GO:0012511	monolayer-surrounded lipid storage body	0.00048049	2
Foliar	GO	GO:0009522	photosystem I	0.000519691	2
Foliar	GO	GO:0008610	lipid biosynthetic process	0.000674061	4
Foliar	GO	GO:0016068	type I hypersensitivity	0.000767367	6
Foliar	GO	GO:0016310	phosphorylation	0.00108451	4
Foliar	GO	GO:0009725	response to hormone stimulus	0.00168145	4
Foliar	GO	GO:0016772	transferase activity, transferring phosphorus-containing groups	0.00169002	4
Foliar	GO	GO:0008408	3'-5' exonuclease activity	0.00194817	2
Foliar	GO	GO:0003999	adenine phosphoribosyltransferase activity	0.00194817	2
Foliar	GO	GO:0006168	adenine salvage	0.00194817	2
Foliar	GO	GO:0048529	magnesium-protoporphyrin IX monomethyl ester (oxidative) cyclase activity	0.00194817	2
Foliar	GO	GO:0006310	DNA recombination	0.00194817	2
Foliar	GO	GO:0004861	cyclin-dependent protein kinase inhibitor activity	0.00194817	2
Foliar	GO	GO:0007050	cell cycle arrest	0.00194817	2
Foliar	GO	GO:0015977	carbon fixation	0.00221677	2
Foliar	GO	GO:0016984	ribulose-bisphosphate carboxylase activity	0.00221677	2
Foliar	GO	GO:0030170	pyridoxal phosphate binding	0.0023087	4
Foliar	GO	GO:0004177	aminopeptidase activity	0.0023087	3
Foliar	GO	GO:0006633	fatty acid biosynthetic process	0.00231072	4
Foliar	GO	GO:0006334	nucleosome assembly	0.00240138	5
Foliar	GO	GO:0016602	CCAAT-binding factor complex	0.00240138	2
Foliar	GO	GO:0019419	sulfate reduction	0.00240138	2
Foliar	GO	GO:0000786	nucleosome	0.00257623	5
Foliar	GO	GO:0000103	sulfate assimilation	0.00282109	2
Foliar	GO	GO:0004781	sulfate adenylyltransferase (ATP) activity	0.00282109	2
Foliar	GO	GO:0008171	O-methyltransferase activity	0.00282109	2
Foliar	GO	GO:0004008	copper-exporting ATPase activity	0.00282109	2
Foliar	GO	GO:0004014	adenosylmethionine decarboxylase activity	0.00282109	2
Foliar	GO	GO:0006597	spermine biosynthetic process	0.00282109	2
Foliar	GO	GO:0008295	spermidine biosynthetic process	0.00282109	2
Foliar	GO	GO:0004512	inositol-3-phosphate synthase activity	0.00282109	2
Foliar	GO	GO:0006021	inositol biosynthetic process	0.00282109	2
Foliar	GO	GO:0008271	secondary active sulfate transmembrane transporter activity	0.00282109	2
Foliar	GO	GO:0008272	sulfate transport	0.00282109	2
Foliar	GO	GO:0016987	sigma factor activity	0.00282109	2
Foliar	GO	GO:0004611	phosphoenolpyruvate carboxykinase activity	0.00282109	2
Foliar	GO	GO:0004612	phosphoenolpyruvate carboxykinase (ATP) activity	0.00282109	2
Foliar	GO	GO:0017076	purine nucleotide binding	0.00282109	2
Foliar	GO	GO:0009654	oxygen evolving complex	0.00282109	2
Foliar	GO	GO:0019898	extrinsic to membrane	0.00282109	2
Foliar	GO	GO:0003871	5-methyltetrahydropteroyltriglutamate-homocysteine S-methyltransferase activity	0.00282109	2
Foliar	GO	GO:0009086	methionine biosynthetic process	0.00282109	2
Foliar	GO	GO:0020037	heme binding	0.00396081	6
Foliar	GO	GO:0016747	transferase activity, transferring acyl groups other than amino-acyl groups	0.00488813	4
Foliar	GO	GO:0015995	chlorophyll biosynthetic process	0.00497266	2
Foliar	GO	GO:0022900	electron transport chain	0.00577491	2
Foliar	GO	GO:0006508	proteolysis	0.00577491	7
Foliar	GO	GO:0009536	plastid	0.00678687	2
Foliar	GO	GO:0008652	cellular amino acid biosynthetic process	0.00772742	2
Foliar	GO	GO:0051537	2 iron, 2 sulfur cluster binding	0.0087382	2
Foliar	GO	GO:0004930	G-protein coupled receptor activity	0.0108844	2
Foliar	GO	GO:0016671	oxidoreductase activity, acting on a sulfur group of donors, disulfide as acceptor	0.0109799	2
Foliar	GO	GO:0004969	histamine receptor activity	0.0109799	3
Foliar	GO	GO:0008483	transaminase activity	0.0111583	2
Foliar	GO	GO:0008654	phospholipid biosynthetic process	0.0117988	2
Foliar	GO	GO:0016847	1-aminocyclopropane-1-carboxylate synthase activity	0.0120793	2
Foliar	GO	GO:0009538	photosystem I reaction center	0.0133373	2
Foliar	GO	GO:0004966	galanin receptor activity	0.0134568	2
Foliar	GO	GO:0006094	gluconeogenesis	0.0136185	2
Foliar	GO	GO:0005985	sucrose metabolic process	0.0136185	2
Foliar	GO	GO:0046524	sucrose-phosphate synthase activity	0.0136185	2
Foliar	GO	GO:0004879	ligand-activated sequence-specific DNA binding RNA polymerase II transcription factor activity	0.0167466	5
Foliar	GO	GO:0001619	lysosphingolipid and lysophosphatidic acid receptor activity	0.0198077	2
Foliar	GO	GO:0016308	1-phosphatidylinositol-4-phosphate 5-kinase activity	0.0217272	2
Foliar	GO	GO:0008378	galactosyltransferase activity	0.0222237	2
Foliar	GO	GO:0005089	Rho guanyl-nucleotide exchange factor activity	0.0236039	2
Foliar	GO	GO:0006865	amino acid transport	0.0236039	2
Foliar	GO	GO:0006811	ion transport	0.0294546	2
Foliar	GO	GO:0015079	potassium ion transmembrane transporter activity	0.0294546	2
Foliar	GO	GO:0007600	sensory perception	0.0294546	2
Foliar	GO	GO:0008020	G-protein coupled photoreceptor activity	0.0294546	2
Foliar	GO	GO:0009585	red, far-red light phototransduction	0.0294546	2
Foliar	GO	GO:0009881	photoreceptor activity	0.0294546	2
Foliar	GO	GO:0017006	protein-tetrapyrrole linkage	0.0294546	2
Foliar	GO	GO:0018298	protein-chromophore linkage	0.0294546	2
Foliar	GO	GO:0046873	metal ion transmembrane transporter activity	0.0301718	2
Foliar	GO	GO:0042802	identical protein binding	0.0358741	2
Foliar	GO	GO:0043086	negative regulation of catalytic activity	0.0358741	2
Foliar	GO	GO:0006857	oligopeptide transport	0.0367459	2
Foliar	GO	GO:0006486	protein glycosylation	0.0395839	2
Foliar	GO	GO:0009116	nucleoside metabolic process	0.0450588	2
Foliar	GO	GO:0004672	protein kinase activity	0.046016	11
Foliar	GO	GO:0005216	ion channel activity	0.0493863	2
Foliar	GO	GO:0016043	cellular component organization	0.0496308	2
Foliar	mapman	35	not assigned	6.00538e-40	112
Foliar	mapman	27.3	RNA.regulation of transcription	3.00848e-33	71
Foliar	mapman	27	RNA	7.51578e-33	75
Foliar	mapman	1	PS	2.0859e-20	17
Foliar	mapman	1.1	PS.lightreaction	1.04656e-19	15
Foliar	mapman	33	development	4.39325e-13	18
Foliar	mapman	28	DNA	1.61115e-12	16
Foliar	mapman	17	hormone metabolism	7.63802e-12	17
Foliar	mapman	1.1.1	PS.lightreaction.photosystem II	4.19367e-10	7
Foliar	mapman	15	metal handling	4.4937e-09	7
Foliar	mapman	29	protein	2.2923e-08	38
Foliar	mapman	3	minor CHO metabolism	2.41925e-08	8
Foliar	mapman	29.2.1	protein.synthesis.ribosomal protein	5.27645e-08	12
Foliar	mapman	3.2	minor CHO metabolism.trehalose	9.9153e-08	6
Foliar	mapman	29.2	protein.synthesis	2.0499e-07	13
Foliar	mapman	14	S-assimilation	4.79096e-07	4
Foliar	mapman	31	cell	1.28783e-06	16
Foliar	mapman	10.1	cell wall.precursor synthesis	2.02921e-06	6
Foliar	mapman	29.2.1.1.1.2	protein.synthesis.ribosomal protein.prokaryotic.chloroplast.50S subunit	2.78371e-05	4
Foliar	mapman	30	signalling	2.78371e-05	17
Foliar	mapman	1.1.2	PS.lightreaction.photosystem I	3.06304e-05	4
Foliar	mapman	29.2.1.1.1	protein.synthesis.ribosomal protein.prokaryotic.chloroplast	7.49234e-05	4
Foliar	mapman	28.1	DNA.synthesis/chromatin structure	0.000105745	4
Foliar	mapman	17.2	hormone metabolism.auxin	0.00011503	6
Foliar	mapman	26	misc	0.000148116	12
Foliar	mapman	29.2.1.1	protein.synthesis.ribosomal protein.prokaryotic	0.000326483	4
Foliar	mapman	34	transport	0.000478199	12
Foliar	mapman	10	cell wall	0.000478199	8
Foliar	mapman	17.4	hormone metabolism.cytokinin	0.00061334	4
Foliar	mapman	23.3.1	nucleotide metabolism.salvage.phosphoribosyltransferases	0.000752294	2
Foliar	mapman	11.1	lipid metabolism.FA synthesis and FA elongation	0.000752294	4
Foliar	mapman	1.1.4	PS.lightreaction.ATP synthase	0.000761122	2
Foliar	mapman	11	lipid metabolism	0.00123845	7
Foliar	mapman	3.4	minor CHO metabolism.myo-inositol	0.00141332	2
Foliar	mapman	10.1.1	cell wall.precursor synthesis.NDP sugar pyrophosphorylase	0.00141332	2
Foliar	mapman	6	gluconeogenese/ glyoxylate cycle	0.00141332	2
Foliar	mapman	19	tetrapyrrole synthesis	0.00163916	3
Foliar	mapman	29.2.1.2.1	protein.synthesis.ribosomal protein.eukaryotic.40S subunit	0.00163916	4
Foliar	mapman	29.2.1.2	protein.synthesis.ribosomal protein.eukaryotic	0.00180344	6
Foliar	mapman	29.2.1.99.1	protein.synthesis.ribosomal protein.unknown.small subunit	0.00267199	2
Foliar	mapman	20	stress	0.00305685	8
Foliar	mapman	23	nucleotide metabolism	0.00363855	4
Foliar	mapman	17.5	hormone metabolism.ethylene	0.00440961	3
Foliar	mapman	1.1.5	PS.lightreaction.other electron carrier (ox/red)	0.00560194	2
Foliar	mapman	2.1.1	major CHO metabolism.synthesis.sucrose	0.00667408	2
Foliar	mapman	29.2.1.99	protein.synthesis.ribosomal protein.unknown	0.00668397	2
Foliar	mapman	17.6.1	hormone metabolism.gibberelin.synthesis-degradation	0.00823412	2
Foliar	mapman	26.4	misc.beta 1,3 glucan hydrolases	0.008639	2
Foliar	mapman	11.9.2	lipid metabolism.lipid degradation.lipases	0.00975112	2
Foliar	mapman	20.2	stress.abiotic	0.0106137	6
Foliar	mapman	1.3	PS.calvin cycle	0.0123475	2
Foliar	mapman	23.3	nucleotide metabolism.salvage	0.0140533	2
Foliar	mapman	16.2	secondary metabolism.phenylpropanoids	0.0178428	2
Foliar	mapman	16.2.1	secondary metabolism.phenylpropanoids.lignin biosynthesis	0.0178428	2
Foliar	mapman	2.1	major CHO metabolism.synthesis	0.024426	2
Foliar	mapman	17.6	hormone metabolism.gibberelin	0.0258013	2
Foliar	mapman	13	amino acid metabolism	0.0258013	4
Foliar	mapman	29.5	protein.degradation	0.0290679	11
Foliar	mapman	13.1.3	amino acid metabolism.synthesis.aspartate family	0.038274	2
Foliar	mapman	17.7	hormone metabolism.jasmonate	0.0385827	2
Foliar	mapman	17.7.1	hormone metabolism.jasmonate.synthesis-degradation	0.0385827	2
Foliar	mapman	13.1.1.3	amino acid metabolism.synthesis.central amino acid metabolism.alanine	0.0387681	1
Foliar	mapman	13.1	amino acid metabolism.synthesis	0.0416142	3
Foliar	mapman	22	polyamine metabolism	0.0460766	1
Foliar	mapman	22.1	polyamine metabolism.synthesis	0.0460766	1
Foliar	Pathway	SULFMETII-PWY	sulfate reduction II (assimilatory)	1.12347e-05	4
Foliar	Pathway	PWY-3821	galactose degradation III	7.91318e-05	6
Foliar	Pathway	PWY-4821	UDP-D-xylose and UDP-D-glucuronate biosynthesis	9.01165e-05	4
Foliar	Pathway	COLANSYN-PWY	colanic acid building blocks biosynthesis	9.61744e-05	6
Foliar	Pathway	TRESYN-PWY	trehalose biosynthesis I	0.000184509	4
Foliar	Pathway	LIPAS-PWY	triacylglycerol degradation	0.000553841	4
Foliar	Pathway	FASYN-ELONG-PWY	fatty acid elongation -- saturated	0.0017144	4
Foliar	Pathway	SUCSYN-PWY	sucrose biosynthesis	0.00176194	4
Foliar	Pathway	PWY-5367	petroselinate biosynthesis	0.00176194	4
Foliar	Pathway	PWY-5971	palmitate biosynthesis II (bacteria and plants)	0.00176194	4
Foliar	Pathway	PWY-5973	cis-vaccenate biosynthesis	0.00176194	4
Foliar	Pathway	PWY-5989	stearate biosynthesis II (plants)	0.00176194	4
Foliar	Pathway	PWY-5156	superpathway of fatty acid biosynthesis II (plant)	0.00306257	4
Foliar	Pathway	PWY-5035	gibberellin biosynthesis III (early C-13 hydroxylation)	0.00306257	2
Foliar	Pathway	GALACTMETAB-PWY	UDP-galactose biosynthesis (salvage pathway from galactose using UDP-glucose)	0.00306257	4
Foliar	Pathway	PWY-5340	sulfate activation for sulfonation	0.00306257	2
Foliar	Pathway	PWY-5995	linoleate biosynthesis I (plants)	0.00306257	2
Foliar	Pathway	PHOTOALL-PWY	oxygenic photosynthesis	0.00306257	4
Foliar	Pathway	PWY-6137	copper transport II	0.00306257	2
Foliar	Pathway	ARGSPECAT-PWY	spermine biosynthesis	0.00306257	2
Foliar	Pathway	BSUBPOLYAMSYN-PWY	spermidine biosynthesis I	0.00306257	2
Foliar	Pathway	PWY-2301	myo-inositol biosynthesis	0.00306257	2
Foliar	Pathway	PWY-4841	UDP-D-glucuronate biosynthesis (from myo-inositol)	0.00306257	2
Foliar	Pathway	PWY-82	UDP-L-arabinose biosynthesis II (from L-arabinose)	0.00306257	2
Foliar	Pathway	PWY-6527	stachyose degradation	0.00525765	4
Foliar	Pathway	SO4ASSIM-PWY	sulfate reduction I (assimilatory)	0.00621597	2
Foliar	Pathway	PWY-6605	adenine and adenosine salvage II	0.0102703	2
Foliar	Pathway	PWY-361	phenylpropanoid biosynthesis	0.0104895	2
Foliar	Pathway	PWY-6039	chlorogenic acid biosynthesis I	0.0104895	2
Foliar	Pathway	ALACAT2-PWY	alanine degradation II (to D-lactate)	0.0121125	2
Foliar	Pathway	ALANINE-SYN2-PWY	alanine biosynthesis II	0.0121125	2
Foliar	Pathway	PWY-5271	phaseic acid biosynthesis	0.0121125	2
Foliar	Pathway	PWY-4661	1D-myo-inositol hexakisphosphate biosynthesis III (Spirodela polyrrhiza)	0.0129121	2
Foliar	Pathway	PWY-5278	sulfite oxidation III	0.0144472	2
Foliar	Pathway	PWY-101	photosynthesis light reactions	0.0158208	2
Foliar	Pathway	PWY-6151	S-adenosyl-L-methionine cycle I	0.0227818	2
Foliar	Pathway	PWY-6596	adenosine nucleotides degradation I	0.0230889	2
Foliar	Pathway	PWY-6351	D-myo-inositol (1,4,5)-trisphosphate biosynthesis	0.0230889	2
Foliar	Pathway	PWY-6352	3-phosphoinositide biosynthesis	0.0230889	2
Foliar	Pathway	PWY-5041	S-adenosyl-L-methionine cycle II	0.0236645	2
Foliar	Pathway	PWY-1121	suberin biosynthesis	0.0250132	2
Foliar	Pathway	ETHYL-PWY	ethylene biosynthesis from methionine	0.0332816	2
Foliar	Pathway	PWY-2902	cytokinins-O-glucoside biosynthesis	0.0367229	2
Foliar	Pathway	SULFATE-CYS-PWY	superpathway of sulfate assimilation and cysteine biosynthesis	0.0367229	2
Foliar	Pathway	PWY-702	methionine biosynthesis II	0.0385332	2
Foliar	Pathway	PWY-561	superpathway of glyoxylate cycle	0.0481512	2
Foliar	PFAM	PF00403.21	HMA	1.05944e-12	14
Foliar	PFAM	PF02358.11	Trehalose_PPase	3.80301e-06	6
Foliar	PFAM	PF00512.20	HisKA	7.82866e-06	6
Foliar	PFAM	PF00072.19	Response_reg	2.34618e-05	7
Foliar	PFAM	PF02518.21	HATPase_c	5.42225e-05	6
Foliar	PFAM	PF04873.8	EIN3	5.492e-05	4
Foliar	PFAM	PF00504.16	Chloroa_b-bind	0.000211533	4
Foliar	PFAM	PF02309.11	AUX_IAA	0.000211533	6
Foliar	PFAM	PF00046.24	Homeobox	0.000295867	7
Foliar	PFAM	PF03924.8	CHASE	0.00035101	4
Foliar	PFAM	PF00067.17	p450	0.000385565	6
Foliar	PFAM	PF00982.16	Glyco_transf_20	0.000398826	4
Foliar	PFAM	PF00924.13	MS_channel	0.000482853	3
Foliar	PFAM	PF03000.9	NPH3	0.000482853	4
Foliar	PFAM	PF03479.10	DUF296	0.000861307	4
Foliar	PFAM	PF00125.19	Histone	0.00092514	4
Foliar	PFAM	PF03195.9	DUF260	0.000943767	4
Foliar	PFAM	PF12697.2	Abhydrolase_6	0.00126999	4
Foliar	PFAM	PF03106.10	WRKY	0.00157522	6
Foliar	PFAM	PF01241.13	PSI_PSAK	0.00191382	2
Foliar	PFAM	PF01852.14	START	0.00219426	4
Foliar	PFAM	PF13326.1	PSII_Pbs27	0.00221014	2
Foliar	PFAM	PF02183.13	HALZ	0.00238679	4
Foliar	PFAM	PF00831.18	Ribosomal_L29	0.0024084	2
Foliar	PFAM	PF04667.12	Endosulfine	0.00303994	2
Foliar	PFAM	PF05042.8	Caleosin	0.0040966	2
Foliar	PFAM	PF06507.8	Auxin_resp	0.00480312	4
Foliar	PFAM	PF02427.12	PSI_PsaE	0.00480312	2
Foliar	PFAM	PF08392.7	FAE1_CUT1_RppA	0.00493799	3
Foliar	PFAM	PF00564.19	PB1	0.00498205	4
Foliar	PFAM	PF08458.5	PH_2	0.00504403	2
Foliar	PFAM	PF01612.15	DNA_pol_A_exo1	0.00513337	2
Foliar	PFAM	PF02915.12	Rubrerythrin	0.0052977	2
Foliar	PFAM	PF02234.14	CDI	0.0052977	2
Foliar	PFAM	PF08541.5	ACP_syn_III_C	0.00557641	3
Foliar	PFAM	PF01698.11	FLO_LFY	0.00557641	2
Foliar	PFAM	PF00101.15	RuBisCO_small	0.00557641	2
Foliar	PFAM	PF12338.3	RbcS	0.00557641	2
Foliar	PFAM	PF02045.10	CBFB_NFYA	0.00563817	2
Foliar	PFAM	PF04862.7	DUF642	0.00563817	2
Foliar	PFAM	PF11900.3	DUF3420	0.00563817	2
Foliar	PFAM	PF07014.7	Hs1pro-1_C	0.00563817	2
Foliar	PFAM	PF07231.7	Hs1pro-1_N	0.00563817	2
Foliar	PFAM	PF01747.12	ATP-sulfurylase	0.00563817	2
Foliar	PFAM	PF14306.1	PUA_2	0.00563817	2
Foliar	PFAM	PF01596.12	Methyltransf_3	0.00563817	2
Foliar	PFAM	PF01546.23	Peptidase_M20	0.00563817	2
Foliar	PFAM	PF07687.9	M20_dimer	0.00563817	2
Foliar	PFAM	PF00111.22	Fer2	0.00563817	2
Foliar	PFAM	PF00202.16	Aminotran_3	0.00563817	2
Foliar	PFAM	PF00984.14	UDPG_MGDP_dh	0.00563817	2
Foliar	PFAM	PF03720.10	UDPG_MGDP_dh_C	0.00563817	2
Foliar	PFAM	PF03721.9	UDPG_MGDP_dh_N	0.00563817	2
Foliar	PFAM	PF01536.11	SAM_decarbox	0.00563817	2
Foliar	PFAM	PF01658.12	Inos-1-P_synth	0.00563817	2
Foliar	PFAM	PF07994.7	NAD_binding_5	0.00563817	2
Foliar	PFAM	PF00916.15	Sulfate_transp	0.00563817	2
Foliar	PFAM	PF01740.16	STAS	0.00563817	2
Foliar	PFAM	PF13792.1	Sulfate_tra_GLY	0.00563817	2
Foliar	PFAM	PF00505.14	HMG_box	0.00563817	2
Foliar	PFAM	PF04539.11	Sigma70_r3	0.00563817	2
Foliar	PFAM	PF04542.9	Sigma70_r2	0.00563817	2
Foliar	PFAM	PF04545.11	Sigma70_r4	0.00563817	2
Foliar	PFAM	PF03321.8	GH3	0.00563817	2
Foliar	PFAM	PF01293.15	PEPCK_ATP	0.00563817	2
Foliar	PFAM	PF05757.6	PsbQ	0.00563817	2
Foliar	PFAM	PF00337.17	Gal-bind_lectin	0.00563817	2
Foliar	PFAM	PF01717.13	Meth_synt_2	0.00563817	2
Foliar	PFAM	PF08267.7	Meth_synt_1	0.00563817	2
Foliar	PFAM	PF01165.15	Ribosomal_S21	0.00646247	2
Foliar	PFAM	PF00380.14	Ribosomal_S9	0.00646247	2
Foliar	PFAM	PF03650.8	UPF0041	0.00671338	2
Foliar	PFAM	PF04759.8	DUF617	0.00743445	2
Foliar	PFAM	PF01777.13	Ribosomal_L27e	0.00812265	2
Foliar	PFAM	PF05703.6	Auxin_canalis	0.00812265	2
Foliar	PFAM	PF05564.7	Auxin_repressed	0.0107459	2
Foliar	PFAM	PF12428.3	DUF3675	0.0121546	2
Foliar	PFAM	PF11833.3	DUF3353	0.0127829	2
Foliar	PFAM	PF04788.7	DUF620	0.0127907	2
Foliar	PFAM	PF03514.9	GRAS	0.0129841	4
Foliar	PFAM	PF11960.3	DUF3474	0.0129841	2
Foliar	PFAM	PF13920.1	zf-C3HC4_3	0.0129841	4
Foliar	PFAM	PF04755.7	PAP_fibrillin	0.0134677	2
Foliar	PFAM	PF00542.14	Ribosomal_L12	0.0168576	2
Foliar	PFAM	PF00248.16	Aldo_ket_red	0.0186263	2
Foliar	PFAM	PF01156.14	IU_nuc_hydro	0.0186263	2
Foliar	PFAM	PF11250.3	DUF3049	0.0186263	2
Foliar	PFAM	PF13405.1	EF_hand_4	0.0200166	2
Foliar	PFAM	PF00487.19	FA_desaturase	0.0203566	2
Foliar	PFAM	PF12579.3	DUF3755	0.02327	2
Foliar	PFAM	PF05879.7	RHD3	0.0235411	4
Foliar	PFAM	PF03097.13	BRO1	0.0235411	2
Foliar	PFAM	PF00520.26	Ion_trans	0.0235411	2
Foliar	PFAM	PF11834.3	DUF3354	0.0235411	2
Foliar	PFAM	PF07526.6	POX	0.0235411	2
Foliar	PFAM	PF03169.10	OPT	0.0235411	2
Foliar	PFAM	PF05116.8	S6PP	0.0235411	2
Foliar	PFAM	PF00156.22	Pribosyltran	0.0352734	2
Foliar	PFAM	PF01704.13	UDPGP	0.0369503	2
Foliar	PFAM	PF02705.11	K_trans	0.0369503	2
Foliar	PFAM	PF07765.7	KIP1	0.0372664	2
Foliar	PFAM	PF01762.16	Galactosyl_T	0.0378989	2
Foliar	PFAM	PF00314.12	Thaumatin	0.0402064	2
Foliar	PFAM	PF10533.4	Plant_zn_clust	0.0402064	2
Foliar	PFAM	PF05542.6	DUF760	0.0433663	2
Foliar	PFAM	PF05553.6	DUF761	0.0433663	2
Foliar	PFAM	PF00335.15	Tetraspannin	0.0454377	2
Foliar	PFAM	PF03759.8	PRONE	0.0457314	2
Foliar	PFAM	PF14379.1	Myb_CC_LHEQLE	0.0468231	2
Foliar	PFAM	PF00534.15	Glycos_transf_1	0.0485476	2
Foliar	PFAM	PF00027.24	cNMP_binding	0.0485655	2
Foliar	PFAM	PF00082.17	Peptidase_S8	0.0485655	2
Foliar	PFAM	PF00360.15	PHY	0.0485655	2
Foliar	PFAM	PF02042.10	RWP-RK	0.0485655	2
Foliar	PFAM	PF08446.6	PAS_2	0.0485655	2
Husk	GO	GO:0005524	ATP binding	8.59416e-16	36
Husk	GO	GO:0003677	DNA binding	1.90834e-15	32
Husk	GO	GO:0004672	protein kinase activity	2.5788e-14	25
Husk	GO	GO:0004674	protein serine/threonine kinase activity	3.61768e-14	25
Husk	GO	GO:0006468	protein phosphorylation	3.61768e-14	25
Husk	GO	GO:0005515	protein binding	3.90776e-11	24
Husk	GO	GO:0042309	homoiothermy	6.77979e-10	18
Husk	GO	GO:0050825	ice binding	6.77979e-10	18
Husk	GO	GO:0050826	response to freezing	6.77979e-10	18
Husk	GO	GO:0016020	membrane	1.5271e-09	20
Husk	GO	GO:0016491	oxidoreductase activity	2.71546e-07	12
Husk	GO	GO:0006950	response to stress	3.9974e-07	6
Husk	GO	GO:0003824	catalytic activity	1.73177e-06	14
Husk	GO	GO:0055085	transmembrane transport	3.68083e-06	11
Husk	GO	GO:0000151	ubiquitin ligase complex	4.87366e-06	6
Husk	GO	GO:0004842	ubiquitin-protein ligase activity	4.87366e-06	6
Husk	GO	GO:0016567	protein ubiquitination	4.87366e-06	6
Husk	GO	GO:0030001	metal ion transport	1.59959e-05	6
Husk	GO	GO:0005975	carbohydrate metabolic process	1.59959e-05	8
Husk	GO	GO:0016021	integral to membrane	1.59959e-05	14
Husk	GO	GO:0006355	regulation of transcription, DNA-dependent	3.48958e-05	15
Husk	GO	GO:0004553	hydrolase activity, hydrolyzing O-glycosyl compounds	3.57383e-05	6
Husk	GO	GO:0003700	sequence-specific DNA binding transcription factor activity	4.54781e-05	12
Husk	GO	GO:0015986	ATP synthesis coupled proton transport	4.89345e-05	5
Husk	GO	GO:0005886	plasma membrane	6.71742e-05	3
Husk	GO	GO:0004990	oxytocin receptor activity	8.22783e-05	3
Husk	GO	GO:0055114	oxidation-reduction process	0.00011679	11
Husk	GO	GO:0009058	biosynthetic process	0.000135784	6
Husk	GO	GO:0007018	microtubule-based movement	0.00016345	5
Husk	GO	GO:0008152	metabolic process	0.00016345	11
Husk	GO	GO:0007186	G-protein coupled receptor signaling pathway	0.000169824	8
Husk	GO	GO:0006096	glycolysis	0.000251634	5
Husk	GO	GO:0008270	zinc ion binding	0.000304631	15
Husk	GO	GO:0046872	metal ion binding	0.000315854	6
Husk	GO	GO:0005507	copper ion binding	0.000380338	4
Husk	GO	GO:0006334	nucleosome assembly	0.000622748	5
Husk	GO	GO:0000786	nucleosome	0.000648056	5
Husk	GO	GO:0004001	adenosine kinase activity	0.00127877	2
Husk	GO	GO:0006166	purine ribonucleoside salvage	0.00127877	2
Husk	GO	GO:0005094	Rho GDP-dissociation inhibitor activity	0.00145918	2
Husk	GO	GO:0009228	thiamine biosynthetic process	0.00145918	2
Husk	GO	GO:0009772	photosynthetic electron transport in photosystem II	0.00157792	2
Husk	GO	GO:0015171	amino acid transmembrane transporter activity	0.00157792	2
Husk	GO	GO:0019684	photosynthesis, light reaction	0.00157792	2
Husk	GO	GO:0030077	plasma membrane light-harvesting complex	0.00157792	2
Husk	GO	GO:0045156	electron transporter, transferring electrons within the cyclic electron transport pathway of photosynthesis activity	0.00157792	2
Husk	GO	GO:0004657	proline dehydrogenase activity	0.001631	2
Husk	GO	GO:0006562	proline catabolic process	0.001631	2
Husk	GO	GO:0003830	beta-1,4-mannosylglycoprotein 4-beta-N-acetylglucosaminyltransferase activity	0.001631	2
Husk	GO	GO:0006487	protein N-linked glycosylation	0.001631	2
Husk	GO	GO:0004576	oligosaccharyl transferase activity	0.00168431	2
Husk	GO	GO:0005737	cytoplasm	0.00168431	6
Husk	GO	GO:0046933	hydrogen ion transporting ATP synthase activity, rotational mechanism	0.00274899	3
Husk	GO	GO:0043565	sequence-specific DNA binding	0.00294063	8
Husk	GO	GO:0006915	apoptotic process	0.00306225	3
Husk	GO	GO:0006810	transport	0.00306225	6
Husk	GO	GO:0005634	nucleus	0.0033538	13
Husk	GO	GO:0009415	response to water	0.00336249	2
Husk	GO	GO:0004872	receptor activity	0.00452877	3
Husk	GO	GO:0006952	defense response	0.00519736	3
Husk	GO	GO:0004356	glutamate-ammonia ligase activity	0.00519736	2
Husk	GO	GO:0006542	glutamine biosynthetic process	0.00519736	2
Husk	GO	GO:0004869	cysteine-type endopeptidase inhibitor activity	0.00519736	2
Husk	GO	GO:0016847	1-aminocyclopropane-1-carboxylate synthase activity	0.00713002	2
Husk	GO	GO:0004806	triglyceride lipase activity	0.00715567	2
Husk	GO	GO:0006537	glutamate biosynthetic process	0.00716553	2
Husk	GO	GO:0004630	phospholipase D activity	0.00716553	2
Husk	GO	GO:0046470	phosphatidylcholine metabolic process	0.00716553	2
Husk	GO	GO:0006559	L-phenylalanine catabolic process	0.00716553	2
Husk	GO	GO:0016841	ammonia-lyase activity	0.00716553	2
Husk	GO	GO:0005985	sucrose metabolic process	0.00716553	2
Husk	GO	GO:0046524	sucrose-phosphate synthase activity	0.00716553	2
Husk	GO	GO:0003924	GTPase activity	0.00940288	4
Husk	GO	GO:0009538	photosystem I reaction center	0.00970139	2
Husk	GO	GO:0003777	microtubule motor activity	0.0114662	3
Husk	GO	GO:0004022	alcohol dehydrogenase (NAD) activity	0.0114662	2
Husk	GO	GO:0006865	amino acid transport	0.0131618	2
Husk	GO	GO:0000015	phosphopyruvate hydratase complex	0.0131618	2
Husk	GO	GO:0004634	phosphopyruvate hydratase activity	0.0131618	2
Husk	GO	GO:0019904	protein domain specific binding	0.0140302	2
Husk	GO	GO:0006855	drug transmembrane transport	0.0140302	2
Husk	GO	GO:0015238	drug transmembrane transporter activity	0.0140302	2
Husk	GO	GO:0015297	antiporter activity	0.0140302	2
Husk	GO	GO:0006397	mRNA processing	0.0140302	2
Husk	GO	GO:0005488	binding	0.0140302	6
Husk	GO	GO:0007600	sensory perception	0.0140302	2
Husk	GO	GO:0008020	G-protein coupled photoreceptor activity	0.0140302	2
Husk	GO	GO:0009585	red, far-red light phototransduction	0.0140302	2
Husk	GO	GO:0009881	photoreceptor activity	0.0140302	2
Husk	GO	GO:0017006	protein-tetrapyrrole linkage	0.0140302	2
Husk	GO	GO:0018298	protein-chromophore linkage	0.0140302	2
Husk	GO	GO:0033178	proton-transporting two-sector ATPase complex, catalytic domain	0.0155884	2
Husk	GO	GO:0005215	transporter activity	0.0155884	4
Husk	GO	GO:0045261	proton-transporting ATP synthase complex, catalytic core F(1)	0.0155884	2
Husk	GO	GO:0004747	ribokinase activity	0.0155884	2
Husk	GO	GO:0006014	D-ribose metabolic process	0.0155884	2
Husk	GO	GO:0016787	hydrolase activity	0.0178886	4
Husk	GO	GO:0008667	2,3-dihydro-2,3-dihydroxybenzoate dehydrogenase activity	0.0192444	2
Husk	GO	GO:0009239	enterobactin biosynthetic process	0.0192444	2
Husk	GO	GO:0006486	protein glycosylation	0.0193512	2
Husk	GO	GO:0003872	6-phosphofructokinase activity	0.0257478	2
Husk	GO	GO:0005945	6-phosphofructokinase complex	0.0257478	2
Husk	GO	GO:0042803	protein homodimerization activity	0.0271327	2
Husk	GO	GO:0005198	structural molecule activity	0.0271358	4
Husk	GO	GO:0016769	transferase activity, transferring nitrogenous groups	0.0310683	2
Husk	GO	GO:0005509	calcium ion binding	0.031975	4
Husk	GO	GO:0005506	iron ion binding	0.036114	4
Husk	GO	GO:0008831	dTDP-4-dehydrorhamnose reductase activity	0.036114	2
Husk	GO	GO:0045226	extracellular polysaccharide biosynthetic process	0.036114	2
Husk	GO	GO:0030528	transcription regulator activity	0.0387147	5
Husk	GO	GO:0016857	racemase and epimerase activity, acting on carbohydrates and derivatives	0.0391481	2
Husk	GO	GO:0009055	electron carrier activity	0.0406546	4
Husk	GO	GO:0046961	proton-transporting ATPase activity, rotational mechanism	0.0418607	2
Husk	GO	GO:0043234	protein complex	0.0429967	2
Husk	GO	GO:0051258	protein polymerization	0.0429967	2
Husk	GO	GO:0003676	nucleic acid binding	0.0450926	6
Husk	GO	GO:0006807	nitrogen compound metabolic process	0.0467193	2
Husk	GO	GO:0004722	protein serine/threonine phosphatase activity	0.0467193	2
Husk	GO	GO:0008287	protein serine/threonine phosphatase complex	0.0467193	2
Husk	GO	GO:0005874	microtubule	0.0483972	2
Husk	GO	GO:0005525	GTP binding	0.0483972	4
Husk	GO	GO:0008324	cation transmembrane transporter activity	0.0486926	2
Husk	mapman	35	not assigned	6.04914e-32	81
Husk	mapman	27	RNA	2.95424e-17	44
Husk	mapman	27.3	RNA.regulation of transcription	1.94503e-16	40
Husk	mapman	30	signalling	4.15799e-11	21
Husk	mapman	26	misc	8.01782e-10	16
Husk	mapman	30.2	signalling.receptor kinases	4.89774e-08	10
Husk	mapman	20	stress	9.80844e-08	12
Husk	mapman	34	transport	1.91507e-06	13
Husk	mapman	29	protein	3.46405e-06	26
Husk	mapman	20.2	stress.abiotic	5.58283e-06	9
Husk	mapman	17.6	hormone metabolism.gibberelin	1.83548e-05	4
Husk	mapman	31	cell	7.41123e-05	11
Husk	mapman	13.2	amino acid metabolism.degradation	0.000161618	4
Husk	mapman	1	PS	0.000322658	5
Husk	mapman	11.9	lipid metabolism.lipid degradation	0.00039464	4
Husk	mapman	29.5.11	protein.degradation.ubiquitin	0.00039464	11
Husk	mapman	29.5.11.4	protein.degradation.ubiquitin.E3	0.000662151	9
Husk	mapman	29.5	protein.degradation	0.000662151	12
Husk	mapman	17	hormone metabolism	0.000719375	7
Husk	mapman	13.2.2	amino acid metabolism.degradation.glutamate family	0.000856316	2
Husk	mapman	1.1	PS.lightreaction	0.000987963	4
Husk	mapman	28	DNA	0.000987963	6
Husk	mapman	28.1	DNA.synthesis/chromatin structure	0.00135534	3
Husk	mapman	15	metal handling	0.00166407	3
Husk	mapman	10	cell wall	0.00170463	6
Husk	mapman	17.5.1	hormone metabolism.ethylene.synthesis-degradation	0.00170463	2
Husk	mapman	17.5	hormone metabolism.ethylene	0.00207893	3
Husk	mapman	23.3.2	nucleotide metabolism.salvage.nucleoside kinases	0.00207893	2
Husk	mapman	2.1.1	major CHO metabolism.synthesis.sucrose	0.00371763	2
Husk	mapman	29.2.1.99	protein.synthesis.ribosomal protein.unknown	0.00472055	2
Husk	mapman	17.6.1	hormone metabolism.gibberelin.synthesis-degradation	0.00543755	2
Husk	mapman	11.9.2	lipid metabolism.lipid degradation.lipases	0.00599988	2
Husk	mapman	12.2	N-metabolism.ammonia metabolism	0.00599988	2
Husk	mapman	13	amino acid metabolism	0.00792456	4
Husk	mapman	23.3	nucleotide metabolism.salvage	0.00961281	2
Husk	mapman	16.2	secondary metabolism.phenylpropanoids	0.00961281	2
Husk	mapman	16.2.1	secondary metabolism.phenylpropanoids.lignin biosynthesis	0.00961281	2
Husk	mapman	13.2.3	amino acid metabolism.degradation.aspartate family	0.0102497	2
Husk	mapman	34.19	transport.Major Intrinsic Proteins	0.0106524	2
Husk	mapman	2.1	major CHO metabolism.synthesis	0.0126422	2
Husk	mapman	1.1.2	PS.lightreaction.photosystem I	0.0133108	2
Husk	mapman	34.1	transport.p- and v-ATPases	0.0177496	2
Husk	mapman	10.5.1	cell wall.cell wall proteins.AGPs	0.0212794	2
Husk	mapman	18	Co-factor and vitamine metabolism	0.0212794	2
Husk	mapman	12	N-metabolism	0.0247535	2
Husk	mapman	11	lipid metabolism	0.029007	4
Husk	mapman	16.1.4	secondary metabolism.isoprenoids.carotenoids	0.0326188	1
Husk	mapman	34.23	transport.hormones	0.03275	1
Husk	mapman	10.1	cell wall.precursor synthesis	0.0461133	2
Husk	mapman	16	secondary metabolism	0.0495841	3
Husk	Pathway	PWY-6126	adenosine nucleotides de novo biosynthesis	0.00126027	5
Husk	Pathway	CITRULBIO-PWY	citrulline biosynthesis	0.0019746	3
Husk	Pathway	PWY-1042	glycolysis IV (plant cytosol)	0.0019746	5
Husk	Pathway	GLYCOLYSIS	glycolysis I	0.0019746	5
Husk	Pathway	ANAGLYCOLYSIS-PWY	glycolysis III	0.00261993	5
Husk	Pathway	PWY-5004	superpathway of citrulline metabolism	0.00381154	3
Husk	Pathway	PWY-5481	pyruvate fermentation to lactate	0.00381154	2
Husk	Pathway	PWY-5464	superpathway of cytosolic glycolysis (plants), pyruvate dehydrogenase and TCA cycle	0.00457119	5
Husk	Pathway	PWY-102	gibberellin inactivation I (2B-hydroxylation)	0.0100078	2
Husk	Pathway	PWY-6619	adenine and adenosine salvage VI	0.0100078	2
Husk	Pathway	PROUT-PWY	proline degradation	0.0105335	2
Husk	Pathway	PWY1F-467	phenylpropanoid biosynthesis, initial reactions	0.0105335	2
Husk	Pathway	PWY-6444	benzoate biosynthesis II (CoA-independent, non-B-oxidative)	0.0105335	2
Husk	Pathway	PWY-6446	benzoate biosynthesis III (CoA-dependent, non-B-oxidative)	0.0105335	2
Husk	Pathway	PWY-6457	trans-cinnamoyl-CoA biosynthesis	0.0105335	2
Husk	Pathway	PWY-4861	UDP-D-galacturonate biosynthesis I (from UDP-D-glucuronate)	0.015054	2
Husk	Pathway	PWY-101	photosynthesis light reactions	0.015054	2
Husk	Pathway	PHOTOALL-PWY	oxygenic photosynthesis	0.015054	3
Husk	Pathway	PWY-3282	ammonia assimilation cycle II	0.015054	2
Husk	Pathway	PWY-3561	choline biosynthesis III	0.015054	2
Husk	Pathway	PWY-5486	pyruvate fermentation to ethanol II	0.015054	2
Husk	Pathway	PWY-5751	phenylethanol biosynthesis	0.015054	2
Husk	Pathway	PWY-6333	acetaldehyde biosynthesis I	0.015054	2
Husk	Pathway	PWY66-21	ethanol degradation II (cytosol)	0.015054	2
Husk	Pathway	PWY-1121	suberin biosynthesis	0.015054	2
Husk	Pathway	GLUCONEO-PWY	gluconeogenesis I	0.0196196	3
Husk	Pathway	ETHYL-PWY	ethylene biosynthesis from methionine	0.0207614	2
Husk	Pathway	PWY-5901	2,3-dihydroxybenzoate biosynthesis	0.0207614	2
Husk	Pathway	PWY-5057	valine degradation II	0.0225699	2
Husk	Pathway	PWY-5076	leucine degradation III	0.0225699	2
Husk	Pathway	PWY-1001	cellulose biosynthesis	0.0295209	2
Husk	Pathway	PWY-381	nitrate reduction II (assimilatory)	0.0299135	2
Husk	Pathway	LIPAS-PWY	triacylglycerol degradation	0.0350094	2
Husk	Pathway	PWY-6549	glutamine biosynthesis III	0.0350094	2
Husk	Pathway	PWY-66	GDP-L-fucose biosynthesis I (from GDP-D-mannose)	0.0360659	2
Husk	Pathway	PWY-6317	galactose degradation I (Leloir pathway)	0.0360659	2
Husk	Pathway	PWYQT-4436	UDP-galactose biosynthesis	0.0360659	2
Husk	Pathway	PWY-4041	G-glutamyl cycle	0.0379628	2
Husk	Pathway	PWY-5826	hypoglycin biosynthesis	0.0379628	2
Husk	Pathway	PWY-5410	traumatin and (Z)-3-hexen-1-yl acetate biosynthesis	0.0397746	2
Husk	Pathway	SUCSYN-PWY	sucrose biosynthesis	0.0497391	2
Husk	Pathway	PWY-2582	brassinosteroid biosynthesis II	0.0497391	2
Husk	PFAM	PF00069.20	Pkinase	1.28469e-08	20
Husk	PFAM	PF03634.8	TCP	1.87425e-06	5
Husk	PFAM	PF08263.7	LRRNT_2	1.04518e-05	7
Husk	PFAM	PF04564.10	U-box	1.04518e-05	6
Husk	PFAM	PF12799.2	LRR_4	1.2802e-05	11
Husk	PFAM	PF00249.26	Myb_DNA-binding	2.89003e-05	16
Husk	PFAM	PF13855.1	LRR_8	0.000384537	15
Husk	PFAM	PF02298.12	Cu_bind_like	0.00196561	3
Husk	PFAM	PF03242.8	LEA_3	0.0040275	2
Husk	PFAM	PF02605.10	PsaL	0.00521447	2
Husk	PFAM	PF01991.13	vATP-synt_E	0.00577273	2
Husk	PFAM	PF04199.8	Cyclase	0.00601794	2
Husk	PFAM	PF03350.11	UPF0114	0.00601794	2
Husk	PFAM	PF02115.12	Rho_GDI	0.00601794	2
Husk	PFAM	PF01946.12	Thi4	0.00601794	2
Husk	PFAM	PF03096.9	Ndr	0.00601794	2
Husk	PFAM	PF13520.1	AA_permease_2	0.00601794	2
Husk	PFAM	PF01619.13	Pro_dh	0.00601794	2
Husk	PFAM	PF04724.8	Glyco_transf_17	0.00601794	2
Husk	PFAM	PF00403.21	HMA	0.00601794	6
Husk	PFAM	PF07891.7	DUF1666	0.00601794	2
Husk	PFAM	PF13432.1	TPR_16	0.00601794	2
Husk	PFAM	PF02516.9	STT3	0.00601794	2
Husk	PFAM	PF00125.19	Histone	0.0083401	3
Husk	PFAM	PF00213.13	OSCP	0.008513	2
Husk	PFAM	PF00232.13	Glyco_hydro_1	0.0145639	3
Husk	PFAM	PF00257.14	Dehydrin	0.0162301	4
Husk	PFAM	PF00234.17	Tryp_alpha_amyl	0.0162892	2
Husk	PFAM	PF01428.11	zf-AN1	0.0162892	2
Husk	PFAM	PF01754.11	zf-A20	0.0162892	2
Husk	PFAM	PF00120.19	Gln-synt_C	0.0162892	2
Husk	PFAM	PF00031.16	Cystatin	0.0162892	2
Husk	PFAM	PF03468.9	XS	0.0188603	2
Husk	PFAM	PF01764.20	Lipase_3	0.0199429	2
Husk	PFAM	PF00046.24	Homeobox	0.0199429	4
Husk	PFAM	PF00225.18	Kinesin	0.0199429	3
Husk	PFAM	PF07526.6	POX	0.0199429	2
Husk	PFAM	PF13962.1	PGG	0.0199429	2
Husk	PFAM	PF12357.3	PLD_C	0.0199429	2
Husk	PFAM	PF00221.14	Lyase_aromatic	0.0199429	2
Husk	PFAM	PF05116.8	S6PP	0.0199429	2
Husk	PFAM	PF00892.15	EamA	0.0199429	3
Husk	PFAM	PF00786.23	PBD	0.0216789	2
Husk	PFAM	PF07714.12	Pkinase_Tyr	0.0230703	5
Husk	PFAM	PF04116.8	FA_hydroxylase	0.0230703	2
Husk	PFAM	PF03641.9	Lysine_decarbox	0.0235239	2
Husk	PFAM	PF00183.13	HSP90	0.0282728	2
Husk	PFAM	PF13589.1	HATPase_c_3	0.0282728	2
Husk	PFAM	PF00847.15	AP2	0.0312153	4
Husk	PFAM	PF00294.19	PfkB	0.0317694	2
Husk	PFAM	PF06136.8	DUF966	0.0324052	2
Husk	PFAM	PF13579.1	Glyco_trans_4_4	0.0348781	2
Husk	PFAM	PF04782.7	DUF632	0.0348923	2
Husk	PFAM	PF04783.7	DUF630	0.0348923	2
Husk	PFAM	PF00534.15	Glycos_transf_1	0.0354866	2
Husk	PFAM	PF00360.15	PHY	0.0354866	2
Husk	PFAM	PF08446.6	PAS_2	0.0354866	2
Husk	PFAM	PF13419.1	HAD_2	0.0362113	4
Husk	PFAM	PF00244.15	2003-03-14	0.0369454	3
Husk	PFAM	PF02458.10	Transferase	0.0393768	2
Husk	PFAM	PF00022.14	Actin	0.0393768	2
Husk	PFAM	PF00106.20	adh_short	0.0402749	2
Husk	PFAM	PF12906.2	RINGv	0.0419442	2
Husk	PFAM	PF14380.1	WAK_assoc	0.0425682	2
Husk	PFAM	PF04844.8	Ovate	0.0425682	2
Husk	PFAM	PF05920.6	Homeobox_KN	0.0454026	2
Husk	PFAM	PF03151.11	TPT	0.0475389	3
Husk	PFAM	PF00155.16	Aminotran_1_2	0.0475389	2
Husk	PFAM	PF00759.14	Glyco_hydro_9	0.0488755	2
Foliar & Husk	GO	GO:0030528	transcription regulator activity	3.06508e-13	14
Foliar & Husk	GO	GO:0016788	hydrolase activity, acting on ester bonds	4.59788e-09	6
Foliar & Husk	GO	GO:0016758	transferase activity, transferring hexosyl groups	5.2881e-09	6
Foliar & Husk	GO	GO:0005634	nucleus	5.86091e-09	17
Foliar & Husk	GO	GO:0006629	lipid metabolic process	1.00518e-06	6
Foliar & Husk	GO	GO:0016020	membrane	5.73504e-06	12
Foliar & Husk	GO	GO:0006508	proteolysis	4.31922e-05	7
Foliar & Husk	GO	GO:0006807	nitrogen compound metabolic process	4.31922e-05	4
Foliar & Husk	GO	GO:0055114	oxidation-reduction process	6.27609e-05	9
Foliar & Husk	GO	GO:0004197	cysteine-type endopeptidase activity	0.000269523	4
Foliar & Husk	GO	GO:0008152	metabolic process	0.00074071	8
Foliar & Husk	GO	GO:0007047	cellular cell wall organization	0.0010338	2
Foliar & Husk	GO	GO:0008466	glycogenin glucosyltransferase activity	0.0010338	2
Foliar & Husk	GO	GO:0009505	plant-type cell wall	0.0010338	2
Foliar & Husk	GO	GO:0030054	cell junction	0.0010338	2
Foliar & Husk	GO	GO:0004107	chorismate synthase activity	0.00108908	2
Foliar & Husk	GO	GO:0003677	DNA binding	0.00122105	11
Foliar & Husk	GO	GO:0004553	hydrolase activity, hydrolyzing O-glycosyl compounds	0.00122105	4
Foliar & Husk	GO	GO:0008270	zinc ion binding	0.00190303	10
Foliar & Husk	GO	GO:0055085	transmembrane transport	0.00190978	6
Foliar & Husk	GO	GO:0015930	glutamate synthase activity	0.00190978	2
Foliar & Husk	GO	GO:0016639	oxidoreductase activity, acting on the CH-NH2 group of donors, NAD or NADP as acceptor	0.00190978	2
Foliar & Husk	GO	GO:0045181	glutamate synthase activity, NADH or NADPH as acceptor	0.00190978	2
Foliar & Husk	GO	GO:0016829	lyase activity	0.00252447	2
Foliar & Husk	GO	GO:0004356	glutamate-ammonia ligase activity	0.00321551	2
Foliar & Husk	GO	GO:0006542	glutamine biosynthetic process	0.00321551	2
Foliar & Husk	GO	GO:0005794	Golgi apparatus	0.00389063	2
Foliar & Husk	GO	GO:0006006	glucose metabolic process	0.00389063	2
Foliar & Husk	GO	GO:0008943	glyceraldehyde-3-phosphate dehydrogenase activity	0.00389063	2
Foliar & Husk	GO	GO:0009073	aromatic amino acid family biosynthetic process	0.00389063	2
Foliar & Husk	GO	GO:0005887	integral to plasma membrane	0.00389063	2
Foliar & Husk	GO	GO:0008515	sucrose transmembrane transporter activity	0.00389063	2
Foliar & Husk	GO	GO:0015770	sucrose transport	0.00389063	2
Foliar & Husk	GO	GO:0006537	glutamate biosynthetic process	0.00560855	2
Foliar & Husk	GO	GO:0030145	manganese ion binding	0.00660347	2
Foliar & Husk	GO	GO:0022891	substrate-specific transmembrane transporter activity	0.00704771	2
Foliar & Husk	GO	GO:0009678	hydrogen-translocating pyrophosphatase activity	0.00873111	2
Foliar & Husk	GO	GO:0016165	lipoxygenase activity	0.00873111	2
Foliar & Husk	GO	GO:0016702	oxidoreductase activity, acting on single donors with incorporation of molecular oxygen, incorporation of two atoms of oxygen	0.00873111	2
Foliar & Husk	GO	GO:0005506	iron ion binding	0.00873111	4
Foliar & Husk	GO	GO:0005975	carbohydrate metabolic process	0.00873111	4
Foliar & Husk	GO	GO:0016491	oxidoreductase activity	0.00908563	5
Foliar & Husk	GO	GO:0030244	cellulose biosynthetic process	0.0103841	2
Foliar & Husk	GO	GO:0005515	protein binding	0.0123574	8
Foliar & Husk	GO	GO:0006835	dicarboxylic acid transport	0.0137097	2
Foliar & Husk	GO	GO:0017153	sodium:dicarboxylate symporter activity	0.0137097	2
Foliar & Husk	GO	GO:0015520	tetracycline:hydrogen antiporter activity	0.0137097	2
Foliar & Husk	GO	GO:0015904	tetracycline transport	0.0137097	2
Foliar & Husk	GO	GO:0046677	response to antibiotic	0.0137097	2
Foliar & Husk	GO	GO:0008308	voltage-gated anion channel activity	0.0151019	2
Foliar & Husk	GO	GO:0042309	homoiothermy	0.0151019	6
Foliar & Husk	GO	GO:0050825	ice binding	0.0151019	6
Foliar & Husk	GO	GO:0050826	response to freezing	0.0151019	6
Foliar & Husk	GO	GO:0048046	apoplast	0.015765	2
Foliar & Husk	GO	GO:0008234	cysteine-type peptidase activity	0.0157672	2
Foliar & Husk	GO	GO:0016769	transferase activity, transferring nitrogenous groups	0.0157672	2
Foliar & Husk	GO	GO:0004437	inositol or phosphatidylinositol phosphatase activity	0.0158051	2
Foliar & Husk	GO	GO:0010181	FMN binding	0.0158802	2
Foliar & Husk	GO	GO:0015992	proton transport	0.0167066	2
Foliar & Husk	GO	GO:0004427	inorganic diphosphatase activity	0.0171745	2
Foliar & Husk	GO	GO:0004499	N,N-dimethylaniline monooxygenase activity	0.0171745	2
Foliar & Husk	GO	GO:0045735	nutrient reservoir activity	0.0174698	2
Foliar & Husk	GO	GO:0005741	mitochondrial outer membrane	0.0189313	2
Foliar & Husk	GO	GO:0006820	anion transport	0.0189313	2
Foliar & Husk	GO	GO:0008324	cation transmembrane transporter activity	0.0250826	2
Foliar & Husk	GO	GO:0005215	transporter activity	0.0310023	3
Foliar & Husk	GO	GO:0051287	NAD binding	0.0310023	2
Foliar & Husk	GO	GO:0006520	cellular amino acid metabolic process	0.0324893	2
Foliar & Husk	GO	GO:0006950	response to stress	0.0346548	2
Foliar & Husk	GO	GO:0050661	NADP binding	0.0366514	2
Foliar & Husk	GO	GO:0004176	ATP-dependent peptidase activity	0.0382779	2
Foliar & Husk	GO	GO:0030170	pyridoxal phosphate binding	0.0449102	2
Foliar & Husk	GO	GO:0051536	iron-sulfur cluster binding	0.0454442	2
Foliar & Husk	mapman	27.3	RNA.regulation of transcription	2.93298e-16	30
Foliar & Husk	mapman	27	RNA	6.9751e-15	30
Foliar & Husk	mapman	34	transport	3.04254e-13	16
Foliar & Husk	mapman	35	not assigned	2.43916e-11	35
Foliar & Husk	mapman	12	N-metabolism	7.57987e-10	6
Foliar & Husk	mapman	26	misc	3.44637e-09	12
Foliar & Husk	mapman	12.2	N-metabolism.ammonia metabolism	2.46664e-07	4
Foliar & Husk	mapman	20	stress	3.45073e-07	9
Foliar & Husk	mapman	20.2	stress.abiotic	4.609e-07	8
Foliar & Husk	mapman	10	cell wall	6.35262e-06	7
Foliar & Husk	mapman	10.5	cell wall.cell wall proteins	5.18469e-05	4
Foliar & Husk	mapman	10.6	cell wall.degradation	0.000177775	3
Foliar & Husk	mapman	13.2.5	amino acid metabolism.degradation.serine-glycine-cysteine group	0.000332104	2
Foliar & Husk	mapman	13	amino acid metabolism	0.00160316	4
Foliar & Husk	mapman	34.2	transport.sugars	0.00181761	2
Foliar & Husk	mapman	13.1.6.1	amino acid metabolism.synthesis.aromatic aa.chorismate	0.00247129	2
Foliar & Husk	mapman	12.1	N-metabolism.nitrate metabolism	0.00547497	2
Foliar & Husk	mapman	17.7	hormone metabolism.jasmonate	0.0120393	2
Foliar & Husk	mapman	17.7.1	hormone metabolism.jasmonate.synthesis-degradation	0.0120393	2
Foliar & Husk	mapman	13.1.6	amino acid metabolism.synthesis.aromatic aa	0.0120393	2
Foliar & Husk	mapman	10.5.1	cell wall.cell wall proteins.AGPs	0.0120393	2
Foliar & Husk	mapman	13.2	amino acid metabolism.degradation	0.021481	2
Foliar & Husk	mapman	4.1	glycolysis.cytosolic branch	0.0363834	2
Foliar & Husk	Pathway	PWY-3282	ammonia assimilation cycle II	2.53059e-06	4
Foliar & Husk	Pathway	PWY-2902	cytokinins-O-glucoside biosynthesis	4.43665e-06	4
Foliar & Husk	Pathway	PWY-381	nitrate reduction II (assimilatory)	8.49234e-06	4
Foliar & Husk	Pathway	GLYSYN-THR-PWY	glycine biosynthesis IV	0.00158189	2
Foliar & Husk	Pathway	GLUGLNSYN-PWY	glutamate biosynthesis IV	0.00276908	2
Foliar & Husk	Pathway	PWY-5409	divinyl ether biosynthesis II	0.0177011	2
Foliar & Husk	Pathway	PWY-5097	lysine biosynthesis VI	0.0251077	2
Foliar & Husk	Pathway	PWY-5067	glycogen biosynthesis II (from UDP-D-Glucose)	0.0251077	2
Foliar & Husk	Pathway	PWY0-1319	CDP-diacylglycerol biosynthesis II	0.0251077	2
Foliar & Husk	Pathway	PWY-5667	CDP-diacylglycerol biosynthesis I	0.0251077	2
Foliar & Husk	Pathway	TRIGLSYN-PWY	triacylglycerol biosynthesis	0.0251077	2
Foliar & Husk	Pathway	LIPAS-PWY	triacylglycerol degradation	0.0251077	2
Foliar & Husk	Pathway	PWY-6549	glutamine biosynthesis III	0.0251077	2
Foliar & Husk	Pathway	PWY-735	jasmonic acid biosynthesis	0.0281221	2
Foliar & Husk	Pathway	PWY-5410	traumatin and (Z)-3-hexen-1-yl acetate biosynthesis	0.0281221	2
Foliar & Husk	Pathway	PWY4FS-7	phosphatidylglycerol biosynthesis I (plastidic)	0.0281221	2
Foliar & Husk	Pathway	PWY4FS-8	phosphatidylglycerol biosynthesis II (non-plastidic)	0.0281221	2
Foliar & Husk	Pathway	ARO-PWY	chorismate biosynthesis I	0.0284384	2
Foliar & Husk	Pathway	PWY-724	superpathway of lysine, threonine and methionine biosynthesis II	0.0440301	2
Foliar & Husk	Pathway	PWY-6628	superpathway of phenylalanine biosynthesis	0.0440301	2
Foliar & Husk	Pathway	PWY-6629	superpathway of tryptophan biosynthesis	0.0450378	2
Foliar & Husk	PFAM	PF00010.21	HLH	1.05577e-09	9
Foliar & Husk	PFAM	PF00657.17	Lipase_GDSL	2.63216e-09	6
Foliar & Husk	PFAM	PF00201.13	UDPGT	4.23965e-05	4
Foliar & Husk	PFAM	PF07983.8	X8	0.000164267	4
Foliar & Husk	PFAM	PF00011.16	HSP20	0.000300807	3
Foliar & Husk	PFAM	PF05512.6	AWPM-19	0.00218871	2
Foliar & Husk	PFAM	PF03637.12	Mob1_phocein	0.00240459	2
Foliar & Husk	PFAM	PF03214.8	RGP	0.00240459	2
Foliar & Husk	PFAM	PF01264.16	Chorismate_synt	0.00240459	2
Foliar & Husk	PFAM	PF01212.16	Beta_elim_lyase	0.00240459	2
Foliar & Husk	PFAM	PF01650.13	Peptidase_C13	0.00240459	2
Foliar & Husk	PFAM	PF02170.17	PAZ	0.00240459	2
Foliar & Husk	PFAM	PF02171.12	Piwi	0.00240459	2
Foliar & Husk	PFAM	PF08699.5	DUF1785	0.00240459	2
Foliar & Husk	PFAM	PF00933.16	Glyco_hydro_3	0.00240459	2
Foliar & Husk	PFAM	PF01915.17	Glyco_hydro_3_C	0.00240459	2
Foliar & Husk	PFAM	PF03951.14	Gln-synt_N	0.00359131	2
Foliar & Husk	PFAM	PF01493.14	GXGXG	0.00359131	2
Foliar & Husk	PFAM	PF01645.12	Glu_synthase	0.00359131	2
Foliar & Husk	PFAM	PF04898.9	Glu_syn_central	0.00359131	2
Foliar & Husk	PFAM	PF00190.17	Cupin_1	0.00373754	2
Foliar & Husk	PFAM	PF03662.9	Glyco_hydro_79n	0.0048421	2
Foliar & Husk	PFAM	PF00043.20	GST_C	0.00524342	2
Foliar & Husk	PFAM	PF00120.19	Gln-synt_C	0.00566879	2
Foliar & Husk	PFAM	PF00310.16	GATase_2	0.00674916	2
Foliar & Husk	PFAM	PF00044.19	Gp_dh_N	0.00674916	2
Foliar & Husk	PFAM	PF02800.15	Gp_dh_C	0.00674916	2
Foliar & Husk	PFAM	PF12579.3	DUF3755	0.00674916	2
Foliar & Husk	PFAM	PF00396.13	Granulin	0.00674916	2
Foliar & Husk	PFAM	PF06813.8	Nodulin-like	0.00674916	2
Foliar & Husk	PFAM	PF01077.17	NIR_SIR	0.00674916	4
Foliar & Husk	PFAM	PF03460.12	NIR_SIR_ferr	0.00674916	4
Foliar & Husk	PFAM	PF04640.9	PLATZ	0.0080993	2
Foliar & Husk	PFAM	PF00684.14	DnaJ_CXXCXGXG	0.00819081	2
Foliar & Husk	PFAM	PF13417.1	GST_N_3	0.00875082	2
Foliar & Husk	PFAM	PF07992.9	Pyr_redox_2	0.00875082	2
Foliar & Husk	PFAM	PF05910.7	DUF868	0.00876551	2
Foliar & Husk	PFAM	PF01553.16	Acyltransferase	0.00911912	2
Foliar & Husk	PFAM	PF13347.1	MFS_2	0.00911912	2
Foliar & Husk	PFAM	PF08246.7	Inhibitor_I29	0.0123795	2
Foliar & Husk	PFAM	PF00305.14	Lipoxygenase	0.0131184	2
Foliar & Husk	PFAM	PF01477.18	PLAT	0.0131184	2
Foliar & Husk	PFAM	PF04570.9	DUF581	0.0142757	2
Foliar & Husk	PFAM	PF00083.19	Sugar_tr	0.0144728	2
Foliar & Husk	PFAM	PF00112.18	Peptidase_C1	0.0144777	2
Foliar & Husk	PFAM	PF00582.21	Usp	0.0150611	2
Foliar & Husk	PFAM	PF03030.11	H_PPase	0.015191	2
Foliar & Husk	PFAM	PF04690.8	YABBY	0.0190901	4
Foliar & Husk	PFAM	PF01459.17	Porin_3	0.0271042	2
Foliar & Husk	PFAM	PF01490.13	Aa_trans	0.0271042	2
Foliar & Husk	PFAM	PF13424.1	TPR_12	0.0271042	6
Foliar & Husk	PFAM	PF00332.13	Glyco_hydro_17	0.0271042	2
Foliar & Husk	PFAM	PF03372.18	Exo_endo_phos	0.0271042	2
Foliar & Husk	PFAM	PF01556.13	DnaJ_C	0.0285933	2
Foliar & Husk	PFAM	PF02469.17	Fasciclin	0.0303389	2
