# Supplementary material for: The impact of widespread regulatory neofunctionalization on homeolog gene evolution following whole-genome duplication in maize
Source: HighWire-hosted journal article supplement (doi:10.1101/gr.172684.114), 2014-04-30
Supplement: Supplemental_Table_4.xlsx [file Supplemental_Table_4.xlsx]

## Sheet: positive_selection_rerun.txt
R-NF?	Homeolog under positive selection	Subgenome	KaKs	Homeolog-pair	Subgenome	KaKs
Non-R-NF	GRMZM2G005229	1	1.05643	GRMZM2G072690	2	0.0630727
Non-R-NF	GRMZM2G032244	1	1.05052	GRMZM2G063729	2	0.132259
Non-R-NF	GRMZM2G100333	2	1.01085	GRMZM2G469409	1	0.606234
Non-R-NF	GRMZM2G113053	1	1.36636	GRMZM5G816015	2	0.239668
Non-R-NF	GRMZM2G128902	1	1.08988	GRMZM2G138632	2	0.643236
Non-R-NF	GRMZM2G130854	2	1.0111	GRMZM2G398506	1	1.04133
Non-R-NF	GRMZM2G163159	2	1.00525	GRMZM2G027856	1	0.71873
Non-R-NF	GRMZM2G386088	2	1.00375	GRMZM2G332560	1	0.486829
Non-R-NF	GRMZM2G398506	1	1.04133	GRMZM2G130854	2	1.0111
R-NF (H)	GRMZM2G162781	2	1.0399	GRMZM2G081857	1	0.896319
